# Supplementary material for: Cognitive and noncognitive predictors of success
Source: PubMed Central journal article supplement — Proc Natl Acad Sci U S A. 2019 Nov 4;116(47):23499–504. doi: 10.1073/pnas.1910510116 (PMC6876246; doi:10.1073/pnas.1910510116), 2019-11-04
Supplement: pnas.1910510116.sapp.pdf [file pnas.1910510116.sapp.pdf]

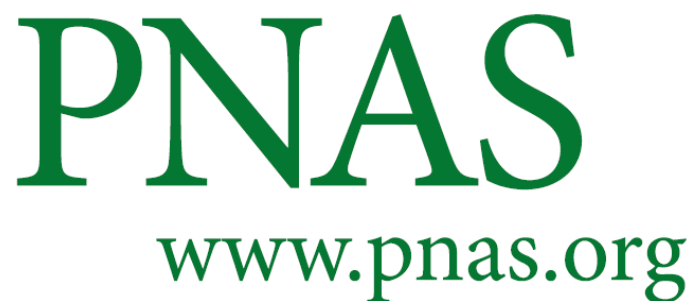

## Supplementary Information for

### Cognitive and Non-Cognitive Predictors of Success

Angela L. Duckworth, Abigail Quirk, Robert Gallop, Rick H. Hoyle, Dennis R. Kelly, Michael D. Matthews

Angela Duckworth  
Email: [aduckworth@characterlab.org](mailto:aduckworth@characterlab.org)

#### **This PDF file includes:**

- Supplementary text
- Figs. S1 to S5
- Tables S1 to S12
- References for SI reference citations

## Participants

Our sample includes  $N = 11,258$  cadets matriculating to the United States Military Academy at West Point in 9 out of 11 cohorts entering between 2004 and 2014. Because the Grit Scale was not administered in 2012 and 2013, these cohorts were not included. Participants were 17% female, 74% White, 8% Black, 7% Asian, and 3% of other ethnic backgrounds. The average age of cadets on entry to West Point was 19 years old. Table S6 includes descriptive statistics and bivariate correlations for all predictors, demographic covariates, and outcomes.

## Procedure and Measures

Cadets completed the 12-item Grit Scale (1) on either the second or third day of Beast Barracks. Table S12 shows six positively-scored items on this self-report questionnaire indexing perseverance of effort (e.g., “Setbacks don’t discourage me”), and six reverse-scored items indexing consistency of interest (e.g., “I become interested in new pursuits every few months.”). Cadets endorsed items using a 5-point Likert-type scale ranging from 1 = *not at all like me* to 5 = *very much like me*. The average alpha internal reliability of the scale was .78, and the average correlation between passion and perseverance subscales was  $r = 0.34$ ,  $P < 0.001$ .

As a measure of cognitive ability, we obtained from West Point admissions records each cadet’s highest college entrance exam scores (math and verbal SAT and/or English, math, reading, and science ACT). Most of the cadets in our sample (79.7%) submitted SAT scores; for the 18.8% of cadets who reported only the ACT, we converted ACT scores to SAT equivalent scores using published concordance tables.

As a measure of physical ability, we obtained from West Point admissions records scores for the Candidate Fitness Assessment (CFA), a battery of six timed fitness tests (e.g., one-mile run, pull-ups, and sit-ups) administered by the cadet’s high school coach, gym teacher, or other approved official. For cadets entering West Point in 2004 and 2005, only four of these six tests

(called the Physical Aptitude Evaluation) were administered, so for all analyses, we standardized scores within cohort year.

West Point provided data on demographics and all success outcomes, including whether cadets completed Beast Barracks training; whether they graduated from West Point; and cumulative grade point averages (GPAs) for academic, military, and physical performance, respectively.

### **Analytic Strategy**

All analyses were conducted as a mega-analysis with cadet-level data. Analyses were based on all observed data using pairwise deletion. Tables S7 to S11 summarize 11 different models predicting each of the five success outcomes in this investigation. In all models, we controlled for demographic covariates (gender, age, ethnicity, and cohort year) and, in addition, included quadratic terms for all three pre-training variables.

We describe in the main text the results of Model 1, in which these pre-training predictors are entered simultaneously. For comparison, see Models 6, 7, and 8, in which grit, cognitive ability, and physical ability are separately entered, respectively. Given the lack of shared variance among the three pre-training predictors, it is unsurprising that coefficients differ minimally between Model 1 and these alternative models. In the main manuscript, we include graphs for the predicted values of Model 1, and for comparison we include the actual values of Model 1 in Figures S1 to S5 in this supplement.

In Model 2, we show that substituting the Short Grit Scale (Grit-S), an 8-item subset of the 12 items in the original Grit Scale used at least as widely in research on grit as the original Grit Scale (3), produces nearly identical results. In addition, Model 3 shows results for the 6-item passion and perseverance subscales entered separately. Consistent with prior research (1), we

observed directionally identical but generally smaller effects for each subscale than for the full scale.

Model 4 substitutes the Whole Candidate Score for cognitive and physical ability, showing that the predictive validity estimates for grit are comparable to Model 1. The Whole Candidate Score is a composite measure used in the admissions process. These pre-registered analyses ([AsPredicted 7017](#)) confirm prior research (1). However, the lack of theoretical validity and inconsistent correlations among its components (i.e., SAT, CFA, extracurricular achievement, athletic achievement, high school rank, teacher recommendations,  $r$ s from 0.08 to .72) make interpretation of the Whole Candidate Score difficult.

Model 5 includes two-way interactions among pre-training predictors. Models 9, 10, and 11 show two-way interactions between demographic covariates and grit, cognitive ability, and physical ability, respectively.

### **Cohort Year Interactions**

In parallel with an explicit shift from West Point's traditional culture of attrition (i.e., weed out the weak) to a culture of development (i.e., support cadets in meeting high standards) (4), completion of Beast Barracks increased from 94.2% for incoming cadets in 2004 to 99.1% for cadets entering West Point in 2014, and the linear correlation between percentage of cadets completing Beast and cohort year was significant ( $r = 0.07, P < 0.001$ ).

Whereas military GPA ( $r = -0.09, P < 0.001$ ) and physical GPA ( $r = -0.06, P < 0.001$ ) decreased over the observed 10-year period, academic GPA ( $r = 0.03, P < 0.001$ ) increased slightly. As shown in Model 11 of Tables S8, S9, and S10, the predictive validities of physical ability for military, academic, and physical GPAs increased slightly in recent years but have remained stable for both cognitive ability and grit.

Unlike Beast Barracks completion, West Point graduation rates were stable over the observed 10-year period ( $r = 0.02$ ,  $P = 0.02$ ). We observed no significant interactions between pre-training variables and cohort year for four-year graduation.

## **Interactions With Demographic Characteristics and Curvilinearity in Prediction of GPA**

### **Outcomes**

Cognitive ability was more predictive of academic GPA for non-Asian cadets ( $\beta = .44$ ,  $P < 0.001$ , 99% CI: 0.41–0.47) than for Asian cadets ( $\beta = 0.29$ ,  $P < 0.001$ , 99% CI: 0.21–0.37). Cognitive ability was more predictive of physical GPA for men ( $\beta = 0.14$ ,  $P < 0.001$ , 99% CI: 0.08–0.20) than for women ( $\beta = 0.05$ ,  $P < 0.001$ , 99% CI: 0.02–0.07). Cognitive ability was more predictive of physical GPA for cadets designated as “other race” ( $\beta = 0.22$ ,  $P < 0.001$ , 99% CI: 0.07–0.37) compared to cadets who did not indicate “other race” ( $\beta = 0.06$ ,  $P < 0.001$ , 99% CI: 0.03–0.08).

Of nine quadratic terms assessing non-linear relationships between the three pre-training predictors and three GPA outcomes, three were statistically significant. Generally, these indicated decelerating, as opposed to concave, relationships. Grit predicted monotonic but decelerating increases in military GPA for nearly all values of grit ( $\beta = -.02$ ,  $P < 0.01$ , 99% CI: -0.04– -0.00). Likewise, only increases in physical ability beyond the 99<sup>th</sup> percentile predicted very slight decreases in military GPA ( $\beta = -.04$ ,  $P < 0.001$ , 99% CI: -0.06– -0.03), and only increases in physical ability beyond the 97<sup>th</sup> percentile predicted slight decreases in academic GPA ( $\beta = -.04$ ,  $P < 0.001$ , 99% CI: -0.06– -0.02).

## Figures

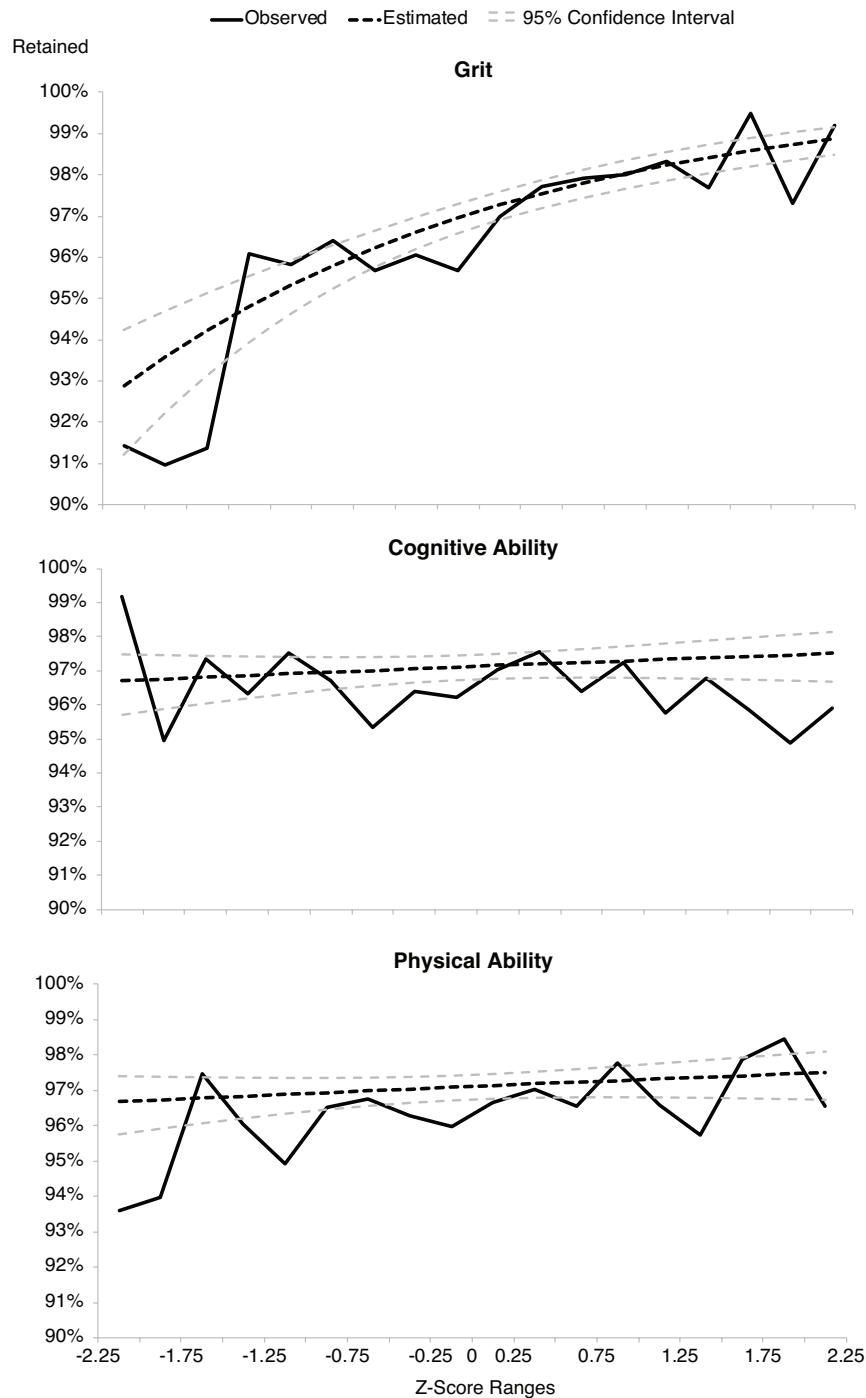

**Fig. S1.** Probability of completing Beast Barracks training as a function of grit, cognitive ability, and physical ability, controlling for gender, race, age, and cohort year—corresponding to binary logistic regression Model 1 in Table S7. Dotted line shows predicted values, using raw data, and solid line shows values of binned data of 0.25 standard deviations per bin.

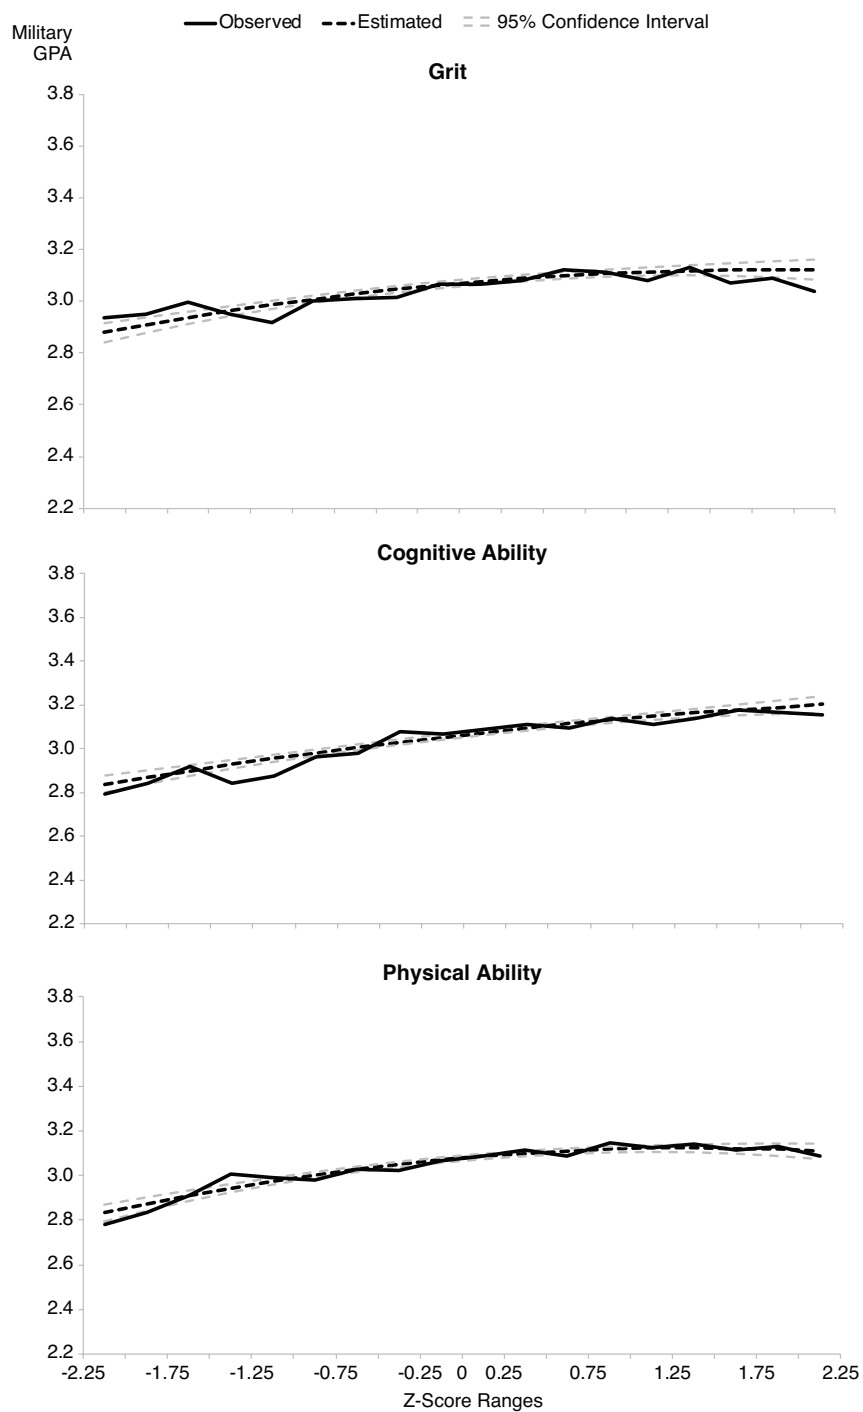

**Fig. S2.** Military GPA as a function of grit, cognitive ability, and physical ability, controlling for gender, race, age, and cohort year—corresponding to linear regression Model 1 in Table S8. Dotted line shows predicted values, using raw data, and solid line shows values of binned data of 0.25 standard deviations per bin.

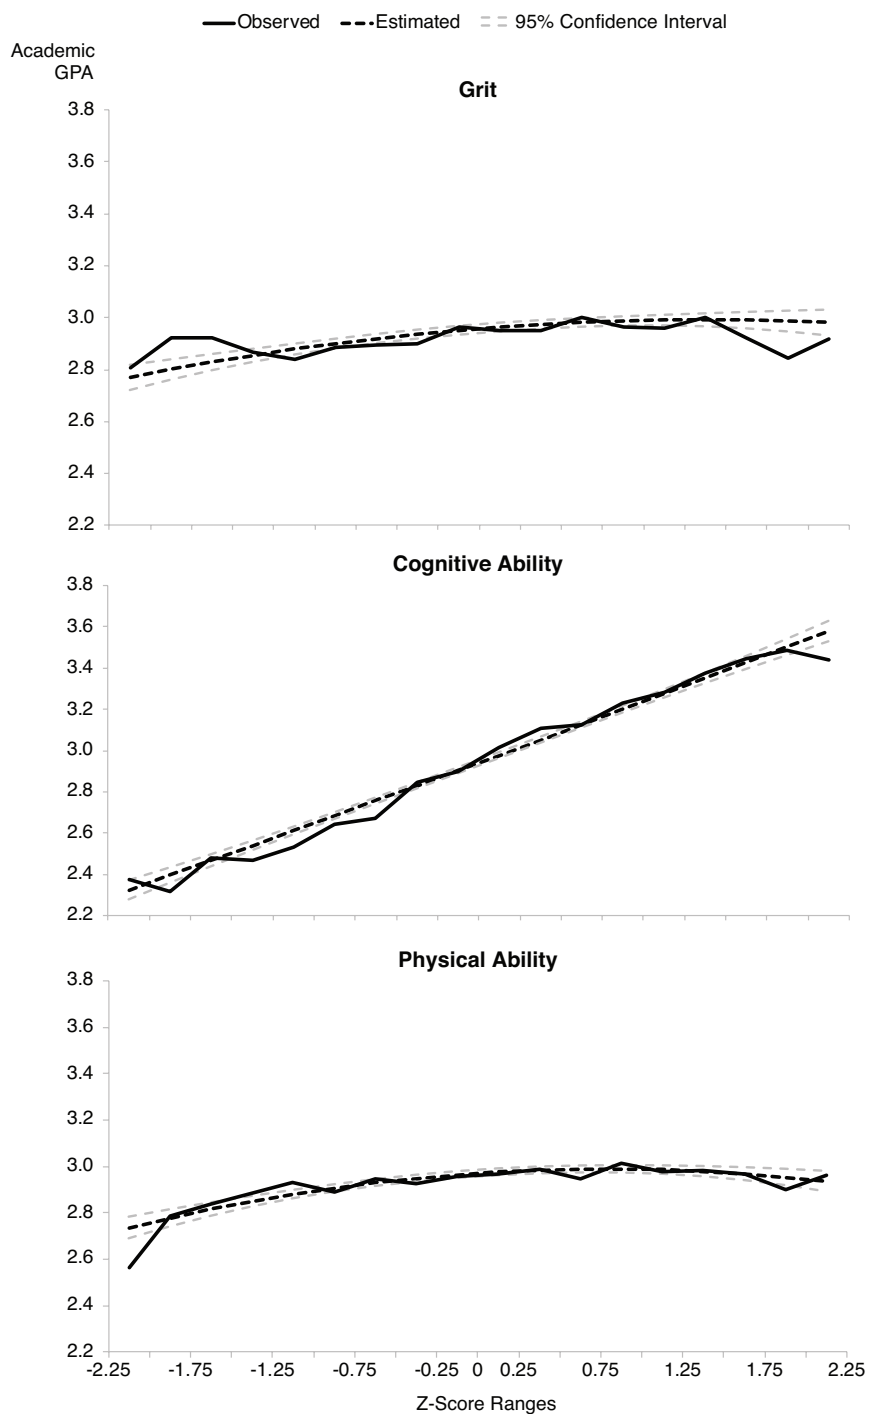

**Fig. S3.** Academic GPA as a function of grit, cognitive ability, and physical ability, controlling for gender, race, age, and cohort year—corresponding to linear regression Model 1 in Table S9. Dotted line shows predicted values, using raw data, and solid line shows values of binned data of 0.25 standard deviations per bin.



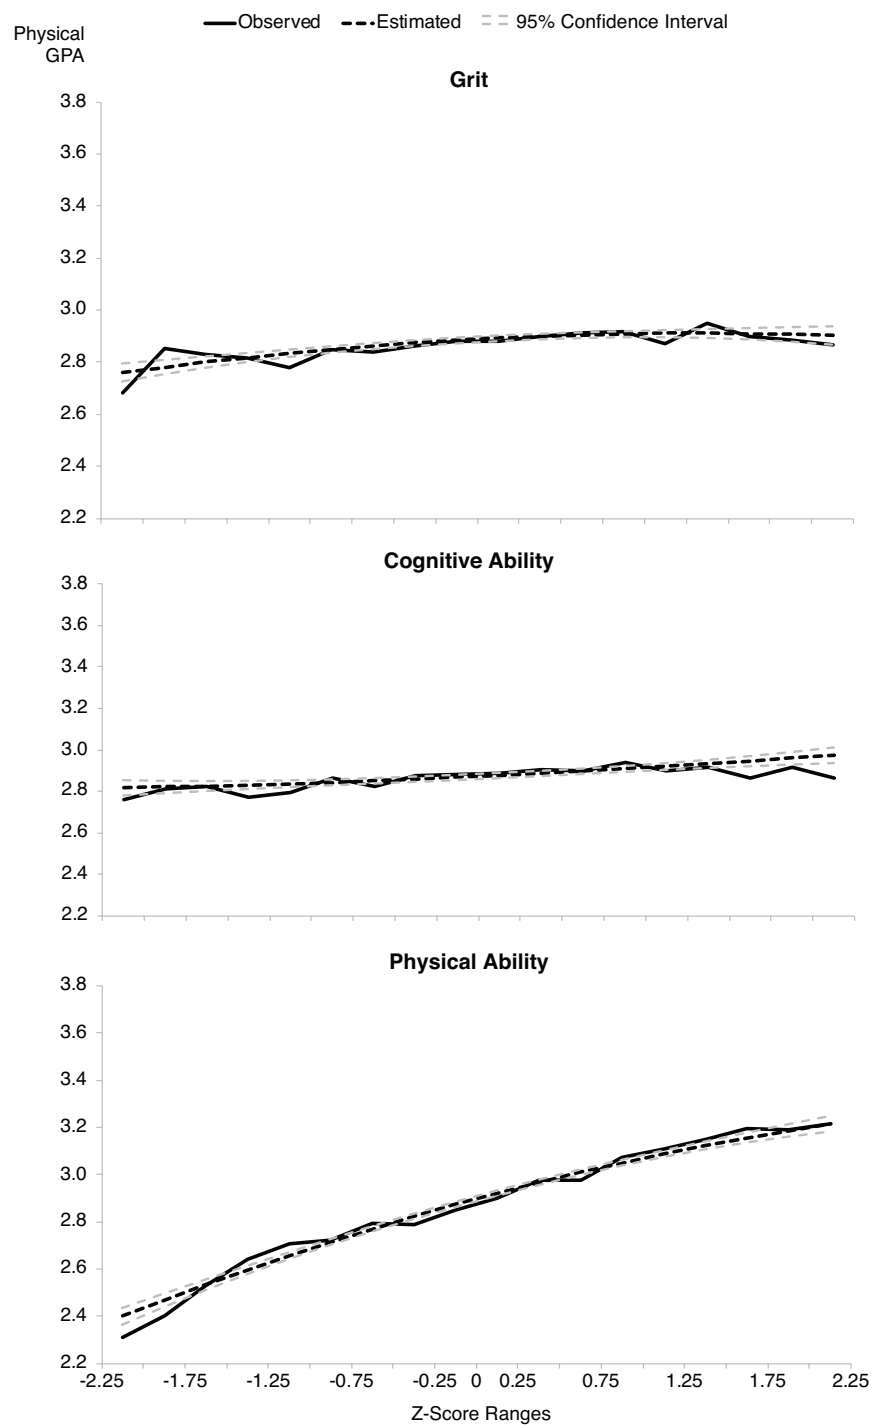

**Fig. S4.** Physical GPA as a function of grit, cognitive ability, and physical ability, controlling for gender, race, age, and cohort year—corresponding to linear regression Model 1 in Table S10. Dotted line shows predicted values, using raw data, and solid line shows values of binned data of 0.25 standard deviations per bin.

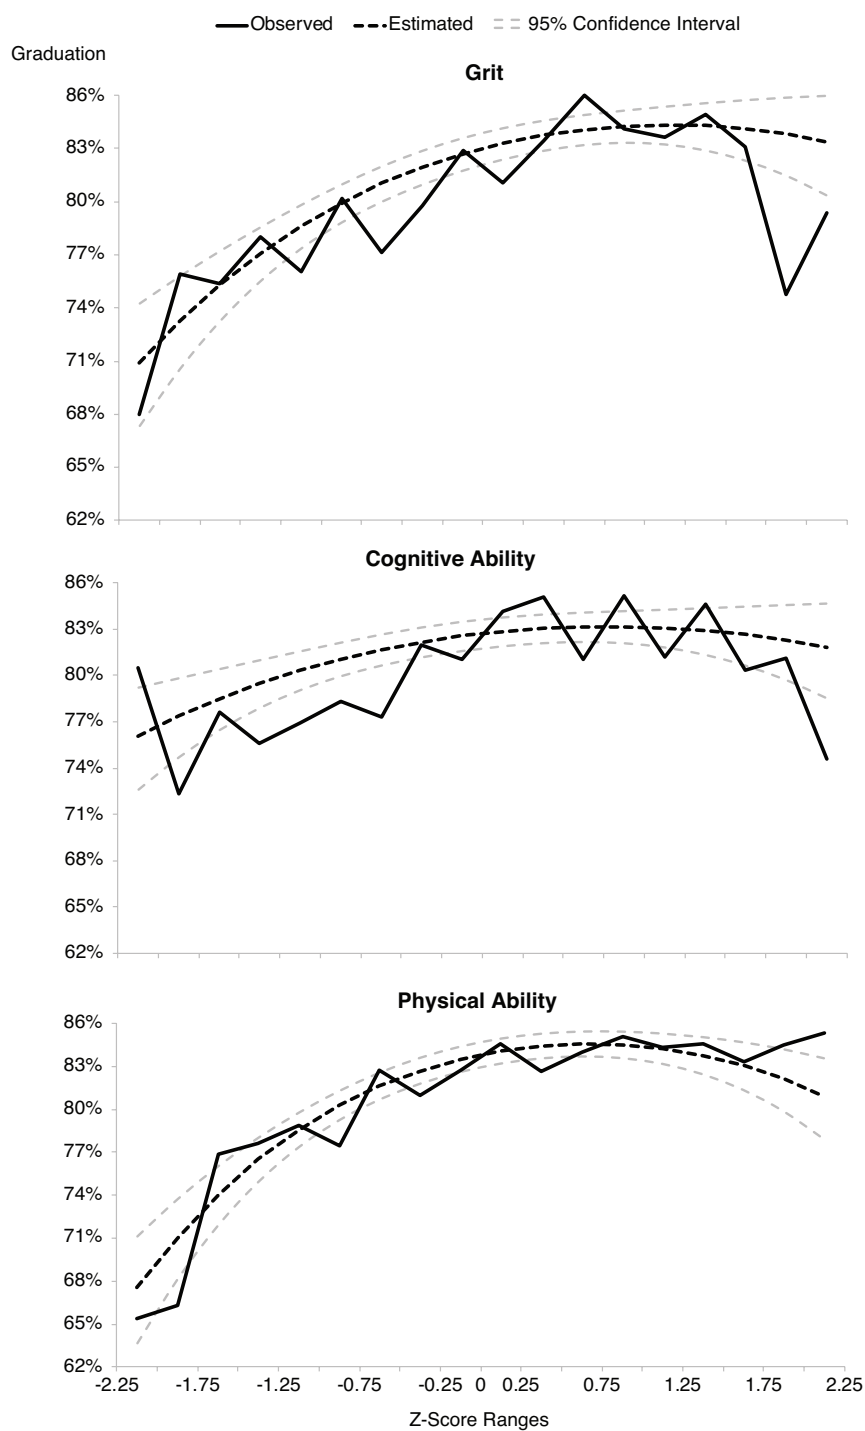

**Fig. S5.** Probability of graduation from West Point as a function of grit, cognitive ability, and physical ability, controlling for gender, race, age, and cohort year—corresponding to binary logistic regression Model 1 in Table S11. Dotted line shows predicted values, using raw data, and solid line shows values of binned data of 0.25 standard deviations per bin.

## Tables

**Table S1. Binary Logistic Regression Models Predicting Beast Barracks Completion by Cohort Year**

| Variable                                     | 2004   | 2005    | 2006   | 2007   | 2008   | 2009   | 2010   | 2011   | 2014   |
|----------------------------------------------|--------|---------|--------|--------|--------|--------|--------|--------|--------|
| <b>Grit</b>                                  | 1.50** | 2.35*** | 1.34*  | 1.28   | 1.90** | 1.67*  | 1.45*  | 1.68*  | 1.55   |
| <b>Cognitive ability</b>                     | 1.10   | 1.00    | 1.17   | 1.14   | 1.18   | 0.89   | 1.01   | 0.78   | 1.36   |
| <b>Physical ability</b>                      | 1.03   | 0.89    | 1.07   | 1.18   | 0.97   | 0.88   | 1.46*  | 0.82   | 1.62   |
| <b>Grit X Grit</b>                           | 0.99   | 1.04    | 0.88   | 0.92   | 0.96   | 0.94   | 1.04   | 1.26   | 1.33   |
| <b>Cognitive ability X Cognitive ability</b> | 0.92   | 1.15    | 1.10   | 1.11   | 0.97   | 0.94   | 0.93   | 0.86   | 0.86   |
| <b>Physical ability X Physical ability</b>   | 1.12   | 1.16    | 1.02   | 0.80*  | 0.92   | 0.96   | 1.02   | 1.09   | 1.42   |
| <b>Female</b>                                | 0.88   | 0.36**  | 0.96   | 0.76   | 0.80   | 0.37*  | 0.83   | 0.46   | 0.81   |
| <b>Age</b>                                   | 1.16   | 1.33    | 1.12   | 1.20   | 1.48   | 0.94   | 1.11   | 0.91   | 1.52   |
| <b>Ethnicity (White is reference)</b>        |        |         |        |        |        |        |        |        |        |
| <b>Black</b>                                 | 2.50   | DNE     | 2.05   | 2.74   | 1.41   | 2.16   | 2.58   | 0.57   | 1.87   |
| <b>Hispanic</b>                              | 1.15   | 3.36    | 5.66   | 0.60   | 1.15   | 0.51   | 1.02   | 2.32   | DNE    |
| <b>Asian</b>                                 | 0.86   | 1.7     | 1.97   | 3.65   | 3.00   | 2.35   | 1.81   | DNE    | 0.33   |
| <b>Other race</b>                            | 2.21   | 1.44    | DNE    | 1.83   | 0.61   | 0.41   | 0.31   | 0.39   | DNE    |
| <b>% Completed</b>                           | 94.19% | 95.11%  | 96.03% | 96.69% | 96.89% | 97.56% | 96.46% | 97.62% | 99.09% |
| <b>R<sup>2</sup></b>                         | 3.96%  | 17.83%  | 4.80%  | 6.95%  | 8.15%  | 7.94%  | 5.13%  | 7.83%  | 9.80%  |
| <b>n</b>                                     | 1,203  | 835     | 1,260  | 1,245  | 1,245  | 1,222  | 1,272  | 1,176  | 1,072  |

*Note.* \*  $p < .05$ , \*\*  $p < .01$ , \*\*\*  $p < .001$ . DNE = Did not estimate coefficient for this specific ethnicity dummy variable due to quasi-separation of the specific coefficient adjusted for other terms in the model.

Table S2. Linear Regression Models Predicting Military GPA by Cohort Year

| Variable                              | 2004    | 2005     | 2006     | 2007     | 2008     | 2009     | 2010     | 2011     | 2014     |
|---------------------------------------|---------|----------|----------|----------|----------|----------|----------|----------|----------|
| <b>Grit</b>                           | 0.15*** | 0.12***  | 0.10***  | 0.09***  | 0.09**   | 0.09**   | 0.13***  | 0.11***  | 0.11**   |
| <b>Cognitive ability</b>              | 0.19*** | 0.23***  | 0.19***  | 0.16***  | 0.13***  | 0.14***  | 0.19***  | 0.15***  | 0.20***  |
| <b>Physical ability</b>               | 0.01    | 0.08*    | 0.18***  | 0.13***  | 0.14***  | 0.13***  | 0.14***  | 0.10***  | 0.18***  |
| <b>Grit X Grit</b>                    | < .001  | < .001   | -0.01    | -0.03    | -0.02    | < .001   | -0.04*   | -0.02    | -0.06*   |
| <b>Cognitive ability X Cognitive</b>  | -0.05   | -0.01    | -0.02    | -0.02    | -0.02    | 0.01     | -0.01    | 0.02     | -0.05    |
| <b>Physical ability X Physical</b>    | < .001  | -0.02    | -0.09*** | -0.07*** | -0.04    | -0.04    | -0.08*** | -0.01    | < .001   |
| <b>Female</b>                         | -0.03   | 0.04     | 0.15     | 0.02     | 0.27***  | 0.12     | 0.27***  | 0.17*    | 0.16     |
| <b>Age</b>                            | 0.06*   | 0.07*    | 0.05     | 0.04     | 0.01     | < .001   | 0.07*    | -0.03    | 0.07     |
| <b>Ethnicity (White is reference)</b> |         |          |          |          |          |          |          |          |          |
| <b>Black</b>                          | -0.23*  | -0.54*** | -0.68*** | -0.36*** | -0.67*** | -0.45*** | -0.27**  | -0.31*** | -0.47*** |
| <b>Hispanic</b>                       | -0.19   | -0.06    | -0.22*   | -0.05    | -0.24*   | 0.01     | -0.14    | -0.31*** | -0.21    |
| <b>Asian</b>                          | -0.14   | -0.01    | -0.03    | -0.08    | -0.39*** | -0.16    | -0.23*   | -0.34**  | -0.50*** |
| <b>Other race</b>                     | -0.13   | -0.14    | -0.12    | -0.23    | -0.32    | 0.19     | -0.17    | -0.32*   | -0.31    |
| <b>R<sup>2</sup></b>                  | 6.28%   | 10.91%   | 12.66%   | 9.87%    | 8.92%    | 6.46%    | 12.88%   | 9.52%    | 9.57%    |
| <b>n</b>                              | 1,133   | 788      | 1,209    | 1,202    | 1,205    | 1,191    | 1,225    | 1,147    | 1,072    |

Note. \*  $p < .05$ , \*\*  $p < .01$ , \*\*\*  $p < .001$

Table S3. Linear Models Predicting Academic GPA by Cohort Year

| Variable                              | 2004    | 2005     | 2006     | 2007     | 2008    | 2009    | 2010     | 2011    | 2014    |
|---------------------------------------|---------|----------|----------|----------|---------|---------|----------|---------|---------|
| <b>Grit</b>                           | 0.05    | 0.06     | 0.07**   | 0.09***  | 0.06*   | 0.02    | 0.10***  | 0.06*   | 0.08**  |
| <b>Cognitive ability</b>              | 0.44*** | 0.44***  | 0.40***  | 0.40***  | 0.37*** | 0.40*** | 0.50***  | 0.42*** | 0.40*** |
| <b>Physical ability</b>               | 0.01    | 0.01     | 0.10***  | 0.04     | 0.09**  | 0.09*** | 0.05*    | 0.07**  | 0.12*** |
| <b>Grit X Grit</b>                    | 0.01    | -0.02    | -0.01    | < .001   | < .001  | -0.03   | -0.04    | -0.02   | -0.06*  |
| <b>Cognitive ability X Cognitive</b>  | -0.02   | 0.04     | < .001   | 0.03     | -0.01   | 0.03    | -0.01    | 0.01    | < .001  |
| <b>Physical ability X Physical</b>    | < .001  | < .001   | -0.07*** | -0.08*** | -0.03   | -0.04*  | -0.07*** | -0.01   | 0.01    |
| <b>Female</b>                         | 0.09    | -0.01    | 0.14*    | 0.04     | 0.25**  | 0.07    | 0.14*    | 0.13    | 0.14*   |
| <b>Age</b>                            | -0.03   | -0.03    | -0.01    | -0.04    | -0.08*  | -0.02   | -0.01    | -0.06*  | -0.03   |
| <b>Ethnicity (White is reference)</b> |         |          |          |          |         |         |          |         |         |
| <b>Black</b>                          | -0.26*  | -0.52*** | -0.46*** | -0.21    | -0.30*  | -0.28** | -0.12    | -0.24** | -0.22*  |
| <b>Hispanic</b>                       | -0.10   | -0.04    | -0.13    | 0.02     | -0.03   | -0.12   | -0.12    | -0.20*  | -0.17   |
| <b>Asian</b>                          | -0.16   | 0.17     | 0.02     | 0.07     | -0.15   | 0.05    | -0.13    | -0.22*  | -0.19   |
| <b>Other race</b>                     | -0.12   | -0.42*   | -0.34    | -0.12    | -0.25   | 0.10    | -0.23    | -0.41** | -0.11   |
| <b>R<sup>2</sup></b>                  | 19.56%  | 21.95%   | 21.88%   | 19.04%   | 14.21%  | 19.99%  | 28.96%   | 25.88%  | 20.03%  |
| <b>n</b>                              | 1,133   | 788      | 1,209    | 1,202    | 1,205   | 1,191   | 1,225    | 1,147   | 1,072   |

Note. \*  $p < .05$ , \*\*  $p < .01$ , \*\*\*  $p < .001$

Table S4. Linear Regression Models Predicting Physical GPA by Cohort Year

| Variable                              | 2004     | 2005     | 2006     | 2007    | 2008     | 2009    | 2010    | 2011    | 2014    |
|---------------------------------------|----------|----------|----------|---------|----------|---------|---------|---------|---------|
| <b>Grit</b>                           | 0.10***  | 0.05     | 0.03     | 0.07**  | 0.09**   | 0.05    | 0.05    | 0.06*   | < .001  |
| <b>Cognitive ability</b>              | 0.07**   | 0.06     | 0.06*    | 0.07**  | 0.09**   | 0.06*   | 0.11*** | 0.02    | 0.07    |
| <b>Physical ability</b>               | 0.23***  | 0.26***  | 0.37***  | 0.38*** | 0.44***  | 0.40*** | 0.38*** | 0.37*** | 0.47*** |
| <b>Grit X Grit</b>                    | 0.02     | < .001   | -0.03    | 0.01    | -0.02    | -0.01   | -0.05*  | -0.01   | -0.04   |
| <b>Cognitive ability X Cognitive</b>  | < .001   | 0.01     | -0.01    | 0.04*   | 0.02     | 0.03    | -0.01   | 0.02    | -0.04   |
| <b>Physical ability X Physical</b>    | -0.02    | -0.04    | -0.12*** | -0.04*  | -0.02    | -0.03   | -0.01   | < .001  | < .001  |
| <b>Female</b>                         | -0.04    | -0.08    | 0.12     | -0.06   | 0.10     | -0.06   | 0.11    | 0.07    | 0.08    |
| <b>Age</b>                            | 0.02     | -0.04    | 0.03     | < .001  | -0.08**  | -0.05*  | -0.01   | -0.08** | 0.01    |
| <b>Ethnicity (White is reference)</b> |          |          |          |         |          |         |         |         |         |
| <b>Black</b>                          | -0.31**  | -0.53*** | -0.36*** | -0.24*  | -0.18    | -0.27** | -0.28** | -0.19*  | -0.16   |
| <b>Hispanic</b>                       | -0.14    | -0.01    | -0.10    | 0.11    | -0.19*   | -0.06   | 0.01    | -0.23** | -0.18   |
| <b>Asian</b>                          | -0.20*   | 0.30     | -0.13    | -0.17   | -0.44*** | -0.09   | -0.11   | -0.32** | -0.38** |
| <b>Other race</b>                     | -0.55*** | -0.20    | -0.19    | -0.04   | -0.10    | -0.21   | -0.30   | -0.28   | -0.22   |
| <b>R<sup>2</sup></b>                  | 9.92%    | 8.78%    | 19.50%   | 18.50%  | 22.83%   | 19.00%  | 18.63%  | 19.05%  | 16.63%  |
| <b>n</b>                              | 1,133    | 788      | 1,209    | 1,202   | 1,205    | 1,191   | 1,225   | 1,147   | 1,072   |

Note. \*  $p < .05$ , \*\*  $p < .01$ , \*\*\*  $p < .001$

Table S5. Binary Logistic Regression Models Predicting Graduation by Cohort Year

| Variable                              | 2004   | 2005   | 2006   | 2007   | 2008   | 2009   | 2010   | 2011   | 2014    |
|---------------------------------------|--------|--------|--------|--------|--------|--------|--------|--------|---------|
| <b>Grit</b>                           | 1.12   | 1.25** | 1.16*  | 1.22** | 1.22*  | 1.13   | 1.27** | 1.09   | 1.18    |
| <b>Cognitive ability</b>              | 1.11   | 1.18   | 1.16   | 1.04   | 1.06   | 1.03   | 1.05   | 0.97   | 1.13    |
| <b>Physical ability</b>               | 0.96   | 1.03   | 1.26** | 1.24** | 1.19*  | 1.15*  | 1.24** | 1.08   | 1.37*** |
| <b>Grit X Grit</b>                    | 0.95   | 0.92   | 0.89*  | 0.95   | 0.98   | 0.92   | 1.01   | 0.99   | 0.87*   |
| <b>Cognitive ability X Cognitive</b>  | 0.85*  | 1.01   | 1.04   | 1.09   | 0.93   | 1.00   | 0.90*  | 0.87** | 0.94    |
| <b>Physical ability X Physical</b>    | 0.97   | 0.99   | 0.86** | 0.85** | 0.85** | 0.85** | 0.88*  | 0.94   | 0.93    |
| <b>Female</b>                         | 0.79   | 0.71   | 0.98   | 0.88   | 1.03   | 0.80   | 1.18   | 0.99   | 0.90    |
| <b>Age</b>                            | 1.01   | 1.06   | 1.09   | 0.85   | 0.86*  | 0.88   | 0.90   | 0.81*  | 1.02    |
| <b>Ethnicity (White is reference)</b> |        |        |        |        |        |        |        |        |         |
| <b>Black</b>                          | 2.29*  | 1.38   | 0.64   | 0.73   | 0.51*  | 0.59   | 0.77   | 0.67   | 0.51**  |
| <b>Hispanic</b>                       | 1.06   | 2.12   | 0.93   | 1.77   | 0.82   | 1.25   | 0.87   | 0.70   | 0.61    |
| <b>Asian</b>                          | 0.69   | 2.18   | 2.16*  | 2.97** | 0.81   | 1.84   | 1.08   | 1.43   | 0.70    |
| <b>Other race</b>                     | 1.62   | 0.87   | 0.77   | 1.08   | 0.71   | 1.94   | 0.55   | 0.51   | 1.20    |
| <b>% Graduated</b>                    | 80.54% | 78.79% | 79.85% | 81.82% | 79.14% | 81.35% | 82.02% | 81.62% | 82.47%  |
| <b>R<sup>2</sup></b>                  | 2.75%  | 4.04%  | 5.59%  | 6.64%  | 5.90%  | 5.42%  | 5.98%  | 4.08%  | 8.08%   |
| <b>n</b>                              | 1,203  | 835    | 1,260  | 1,245  | 1,245  | 1,222  | 1,272  | 1,176  | 1,072   |

Note. \*  $p < .05$ , \*\*  $p < .01$ , \*\*\*  $p < .001$







|                                                    |        |        |        |        |        |        |        |        |        |        |  |        |
|----------------------------------------------------|--------|--------|--------|--------|--------|--------|--------|--------|--------|--------|--|--------|
| Hispanic X Grit                                    |        |        |        |        |        |        |        |        | 0.68   |        |  |        |
| Hispanic X Grit X Grit                             |        |        |        |        |        |        |        |        | 1.30   |        |  |        |
| Hispanic X Cognitive ability                       |        |        |        |        |        |        |        |        |        | 1.06   |  |        |
| Hispanic X Cognitive ability X Cognitive ability   |        |        |        |        |        |        |        |        |        | 1.19   |  |        |
| Hispanic X Physical ability                        |        |        |        |        |        |        |        |        |        |        |  | 0.93   |
| Hispanic X Physical ability X Physical ability     |        |        |        |        |        |        |        |        |        |        |  | 1.23   |
| Asian X Grit                                       |        |        |        |        |        |        |        |        | 1.03   |        |  |        |
| Asian X Grit X Grit                                |        |        |        |        |        |        |        |        | 0.94   |        |  |        |
| Asian X Cognitive ability                          |        |        |        |        |        |        |        |        |        | 0.74   |  |        |
| Asian X Cognitive ability X Cognitive ability      |        |        |        |        |        |        |        |        |        | 1.28   |  |        |
| Asian X Physical ability                           |        |        |        |        |        |        |        |        |        |        |  | 0.81   |
| Asian X Physical ability X Physical ability        |        |        |        |        |        |        |        |        |        |        |  | 1.41   |
| Other race X Grit                                  |        |        |        |        |        |        |        |        | 1.19   |        |  |        |
| Other race X Grit X Grit                           |        |        |        |        |        |        |        |        | 1.17   |        |  |        |
| Other race X Cognitive ability                     |        |        |        |        |        |        |        |        |        | 0.49*  |  |        |
| Other race X Cognitive ability X Cognitive ability |        |        |        |        |        |        |        |        |        | 1.01   |  |        |
| Other race X Physical ability                      |        |        |        |        |        |        |        |        |        |        |  | 0.86   |
| Other race X Physical ability X Physical ability   |        |        |        |        |        |        |        |        |        |        |  | 0.73*  |
| Age X Grit                                         |        |        |        |        |        |        |        |        | 1.05   |        |  |        |
| Age X Grit X Grit                                  |        |        |        |        |        |        |        |        | 1.04   |        |  |        |
| Age X Cognitive ability                            |        |        |        |        |        |        |        |        |        | 0.86*  |  |        |
| Age X Cognitive ability X Cognitive ability        |        |        |        |        |        |        |        |        |        | 0.92   |  |        |
| Age X Physical ability                             |        |        |        |        |        |        |        |        |        |        |  | 0.92   |
| Age X Physical ability X Physical ability          |        |        |        |        |        |        |        |        |        |        |  | 1.02   |
| Cohort X Grit                                      |        |        |        |        |        |        |        |        | 0.99   |        |  |        |
| Cohort X Grit X Grit                               |        |        |        |        |        |        |        |        | 1.01   |        |  |        |
| Cohort X Cognitive ability                         |        |        |        |        |        |        |        |        |        | 1.00   |  |        |
| Cohort X Cognitive ability X Cognitive ability     |        |        |        |        |        |        |        |        |        | 0.98   |  |        |
| Cohort X Physical ability                          |        |        |        |        |        |        |        |        |        |        |  | 1.01   |
| Cohort X Physical ability X Physical ability       |        |        |        |        |        |        |        |        |        |        |  | 0.99   |
| <b>R<sup>2</sup></b>                               | 5.93%  | 5.88%  | 5.88%  | 6.11%  | 5.95%  | 5.97%  | 3.01%  | 2.92%  | 6.72%  | 3.84%  |  | 3.33%  |
| <b>n</b>                                           | 10,530 | 10,530 | 10,522 | 10,876 | 10,530 | 11,197 | 10,852 | 10,962 | 11,197 | 10,852 |  | 10,962 |

Note. \*  $p < .05$ , \*\*  $p < .01$ , \*\*\*  $p < .001$



|                                                    |        |        |        |        |        |        |        |        |        |        |        |        |
|----------------------------------------------------|--------|--------|--------|--------|--------|--------|--------|--------|--------|--------|--------|--------|
| Black X Physical ability X Physical ability        |        |        |        |        |        |        |        |        |        |        |        | -0.04  |
| Hispanic X Grit                                    |        |        |        |        |        |        |        |        |        |        |        | -0.02  |
| Hispanic X Grit X Grit                             |        |        |        |        |        |        |        |        |        |        |        | 0.02   |
| Hispanic X Cognitive ability                       |        |        |        |        |        |        |        |        |        |        |        | -0.02  |
| Hispanic X Cognitive ability X Cognitive ability   |        |        |        |        |        |        |        |        |        |        |        | 0.03   |
| Hispanic X Physical ability                        |        |        |        |        |        |        |        |        |        |        |        | 0.03   |
| Hispanic X Physical ability X Physical ability     |        |        |        |        |        |        |        |        |        |        |        | 0.01   |
| Asian X Grit                                       |        |        |        |        |        |        |        |        |        |        |        | < .001 |
| Asian X Grit X Grit                                |        |        |        |        |        |        |        |        |        |        |        | < .001 |
| Asian X Cognitive ability                          |        |        |        |        |        |        |        |        |        |        |        | -0.07* |
| Asian X Cognitive ability X Cognitive ability      |        |        |        |        |        |        |        |        |        |        |        | -0.05* |
| Asian X Physical ability                           |        |        |        |        |        |        |        |        |        |        |        | -0.05  |
| Asian X Physical ability X Physical ability        |        |        |        |        |        |        |        |        |        |        |        | 0.02   |
| Other race X Grit                                  |        |        |        |        |        |        |        |        |        |        |        | 0.07   |
| Other race X Grit X Grit                           |        |        |        |        |        |        |        |        |        |        |        | -0.04  |
| Other race X Cognitive ability                     |        |        |        |        |        |        |        |        |        |        |        | 0.11   |
| Other race X Cognitive ability X Cognitive ability |        |        |        |        |        |        |        |        |        |        |        | 0.08   |
| Other race X Physical ability                      |        |        |        |        |        |        |        |        |        |        |        | -0.06  |
| Other race X Physical ability X Physical ability   |        |        |        |        |        |        |        |        |        |        |        | 0.03   |
| Age X Grit                                         |        |        |        |        |        |        |        |        |        |        |        | < .001 |
| Age X Grit X Grit                                  |        |        |        |        |        |        |        |        |        |        |        | 0.01*  |
| Age X Cognitive ability                            |        |        |        |        |        |        |        |        |        |        |        | -0.02  |
| Age X Cognitive ability X Cognitive ability        |        |        |        |        |        |        |        |        |        |        |        | 0.01   |
| Age X Physical ability                             |        |        |        |        |        |        |        |        |        |        |        | 0.01   |
| Age X Physical ability X Physical ability          |        |        |        |        |        |        |        |        |        |        |        | -0.01  |
| Cohort X Grit                                      |        |        |        |        |        |        |        |        |        |        |        | < .001 |
| Cohort X Grit X Grit                               |        |        |        |        |        |        |        |        |        |        |        | < .001 |
| Cohort X Cognitive ability                         |        |        |        |        |        |        |        |        |        |        |        | < .001 |
| Cohort X Cognitive ability X Cognitive ability     |        |        |        |        |        |        |        |        |        |        |        | < .001 |
| Cohort X Physical ability                          |        |        |        |        |        |        |        |        |        |        |        | 0.01** |
| Cohort X Physical ability X Physical ability       |        |        |        |        |        |        |        |        |        |        |        | < .001 |
| <b>R<sup>2</sup></b>                               | 9.75%  | 9.91%  | 9.99%  | 13.46% | 9.78%  | 6.00%  | 6.78%  | 6.30%  | 6.13%  | 7.13%  | 6.52%  |        |
| <b>n</b>                                           | 10,172 | 10,172 | 10,165 | 10,505 | 10,172 | 10,824 | 10,491 | 10,590 | 10,824 | 10,491 | 10,590 |        |

Note. \*  $p < .05$ , \*\*  $p < .01$ , \*\*\*  $p < .001$



|                                                    |        |        |        |        |        |        |        |        |        |          |        |
|----------------------------------------------------|--------|--------|--------|--------|--------|--------|--------|--------|--------|----------|--------|
| Black X Physical ability                           |        |        |        |        |        |        |        |        |        |          | -0.02  |
| Black X Physical ability X Physical ability        |        |        |        |        |        |        |        |        |        |          | -0.02  |
| Hispanic X Grit                                    |        |        |        |        |        |        |        |        | -0.01  |          |        |
| Hispanic X Grit X Grit                             |        |        |        |        |        |        |        |        | < .001 |          |        |
| Hispanic X Cognitive ability                       |        |        |        |        |        |        |        |        |        | -0.01    |        |
| Hispanic X Cognitive ability X Cognitive ability   |        |        |        |        |        |        |        |        |        | 0.05*    |        |
| Hispanic X Physical ability                        |        |        |        |        |        |        |        |        |        |          | 0.07*  |
| Hispanic X Physical ability X Physical ability     |        |        |        |        |        |        |        |        |        |          | < .001 |
| Asian X Grit                                       |        |        |        |        |        |        |        |        | < .001 |          |        |
| Asian X Grit X Grit                                |        |        |        |        |        |        |        |        | < .001 |          |        |
| Asian X Cognitive ability                          |        |        |        |        |        |        |        |        |        | -0.12*** |        |
| Asian X Cognitive ability X Cognitive ability      |        |        |        |        |        |        |        |        |        | -0.03    |        |
| Asian X Physical ability                           |        |        |        |        |        |        |        |        |        |          | -0.08* |
| Asian X Physical ability X Physical ability        |        |        |        |        |        |        |        |        |        |          | 0.01   |
| Other race X Grit                                  |        |        |        |        |        |        |        |        | 0.07   |          |        |
| Other race X Grit X Grit                           |        |        |        |        |        |        |        |        | < .001 |          |        |
| Other race X Cognitive ability                     |        |        |        |        |        |        |        |        |        | 0.06     |        |
| Other race X Cognitive ability X Cognitive ability |        |        |        |        |        |        |        |        |        | 0.04     |        |
| Other race X Physical ability                      |        |        |        |        |        |        |        |        |        |          | 0.05   |
| Other race X Physical ability X Physical ability   |        |        |        |        |        |        |        |        |        |          | 0.01   |
| Age X Grit                                         |        |        |        |        |        |        |        |        | < .001 |          |        |
| Age X Grit X Grit                                  |        |        |        |        |        |        |        |        | 0.02** |          |        |
| Age X Cognitive ability                            |        |        |        |        |        |        |        |        |        | -0.01    |        |
| Age X Cognitive ability X Cognitive ability        |        |        |        |        |        |        |        |        |        | 0.02**   |        |
| Age X Physical ability                             |        |        |        |        |        |        |        |        |        |          | 0.01   |
| Age X Physical ability X Physical ability          |        |        |        |        |        |        |        |        |        |          | < .001 |
| Cohort X Grit                                      |        |        |        |        |        |        |        |        | < .001 |          |        |
| Cohort X Grit X Grit                               |        |        |        |        |        |        |        |        | < .001 |          |        |
| Cohort X Cognitive ability                         |        |        |        |        |        |        |        |        |        | < .001   |        |
| Cohort X Cognitive ability X Cognitive ability     |        |        |        |        |        |        |        |        |        | < .001   |        |
| Cohort X Physical ability                          |        |        |        |        |        |        |        |        |        |          | 0.01** |
| Cohort X Physical ability X Physical ability       |        |        |        |        |        |        |        |        |        |          | < .001 |
| <b>R<sup>2</sup></b>                               | 21.23% | 21.43% | 21.48% | 25.07% | 21.23% | 7.13%  | 20.03% | 7.28%  | 7.28%  | 20.36%   | 7.49%  |
| <b>n</b>                                           | 10,172 | 10,172 | 10,165 | 10,505 | 10,172 | 10,824 | 10,491 | 10,590 | 10,824 | 10,491   | 10,590 |

Note. \*  $p < .05$ , \*\*  $p < .01$ , \*\*\*  $p < .001$



|                                                    |        |        |        |        |        |        |        |        |        |        |        |         |
|----------------------------------------------------|--------|--------|--------|--------|--------|--------|--------|--------|--------|--------|--------|---------|
| Black X Physical ability X Physical ability        |        |        |        |        |        |        |        |        |        |        |        | -0.02   |
| Hispanic X Grit                                    |        |        |        |        |        |        |        |        |        |        |        | -0.02   |
| Hispanic X Grit X Grit                             |        |        |        |        |        |        |        |        |        |        |        | < .001  |
| Hispanic X Cognitive ability                       |        |        |        |        |        |        |        |        |        |        |        | 0.02    |
| Hispanic X Cognitive ability X Cognitive ability   |        |        |        |        |        |        |        |        |        |        |        | 0.03    |
| Hispanic X Physical ability                        |        |        |        |        |        |        |        |        |        |        |        | 0.03    |
| Hispanic X Physical ability X Physical ability     |        |        |        |        |        |        |        |        |        |        |        | -0.01   |
| Asian X Grit                                       |        |        |        |        |        |        |        |        |        |        |        | < .001  |
| Asian X Grit X Grit                                |        |        |        |        |        |        |        |        |        |        |        | < .001  |
| Asian X Cognitive ability                          |        |        |        |        |        |        |        |        |        |        |        | < .001  |
| Asian X Cognitive ability X Cognitive ability      |        |        |        |        |        |        |        |        |        |        |        | -0.01   |
| Asian X Physical ability                           |        |        |        |        |        |        |        |        |        |        |        | -0.07*  |
| Asian X Physical ability X Physical ability        |        |        |        |        |        |        |        |        |        |        |        | 0.04    |
| Other race X Grit                                  |        |        |        |        |        |        |        |        |        |        |        | -0.02   |
| Other race X Grit X Grit                           |        |        |        |        |        |        |        |        |        |        |        | -0.01   |
| Other race X Cognitive ability                     |        |        |        |        |        |        |        |        |        |        |        | 0.19**  |
| Other race X Cognitive ability X Cognitive ability |        |        |        |        |        |        |        |        |        |        |        | -0.01   |
| Other race X Physical ability                      |        |        |        |        |        |        |        |        |        |        |        | 0.04    |
| Other race X Physical ability X Physical ability   |        |        |        |        |        |        |        |        |        |        |        | < .001  |
| Age X Grit                                         |        |        |        |        |        |        |        |        |        |        |        | < .001  |
| Age X Grit X Grit                                  |        |        |        |        |        |        |        |        |        |        |        | < .001  |
| Age X Cognitive ability                            |        |        |        |        |        |        |        |        |        |        |        | -0.02*  |
| Age X Cognitive ability X Cognitive ability        |        |        |        |        |        |        |        |        |        |        |        | < .001  |
| Age X Physical ability                             |        |        |        |        |        |        |        |        |        |        |        | < .001  |
| Age X Physical ability X Physical ability          |        |        |        |        |        |        |        |        |        |        |        | < .001  |
| Cohort X Grit                                      |        |        |        |        |        |        |        |        |        |        |        | < .001  |
| Cohort X Grit X Grit                               |        |        |        |        |        |        |        |        |        |        |        | < .001  |
| Cohort X Cognitive ability                         |        |        |        |        |        |        |        |        |        |        |        | < .001  |
| Cohort X Cognitive ability X Cognitive ability     |        |        |        |        |        |        |        |        |        |        |        | < .001  |
| Cohort X Physical ability                          |        |        |        |        |        |        |        |        |        |        |        | 0.02*** |
| Cohort X Physical ability X Physical ability       |        |        |        |        |        |        |        |        |        |        |        | 0.01**  |
| <b>R<sup>2</sup></b>                               | 16.83% | 17.10% | 17.25% | 6.53%  | 16.84% | 3.35%  | 2.70%  | 15.63% | 3.47%  | 3.00%  | 16.17% |         |
| <b>n</b>                                           | 10,172 | 10,172 | 10,165 | 10,505 | 10,172 | 10,824 | 10,491 | 10,590 | 10,824 | 10,491 | 10,590 |         |

Note. \*  $p < .05$ , \*\*  $p < .01$ , \*\*\*  $p < .001$





|                                                    |        |        |        |        |        |        |        |        |        |        |        |       |
|----------------------------------------------------|--------|--------|--------|--------|--------|--------|--------|--------|--------|--------|--------|-------|
| Hispanic X Grit                                    |        |        |        |        |        |        |        |        |        | 0.92   |        |       |
| Hispanic X Grit X Grit                             |        |        |        |        |        |        |        |        |        | 1.05   |        |       |
| Hispanic X Cognitive ability                       |        |        |        |        |        |        |        |        |        |        | 0.95   |       |
| Hispanic X Cognitive ability X Cognitive ability   |        |        |        |        |        |        |        |        |        |        | 1.08   |       |
| Hispanic X Physical ability                        |        |        |        |        |        |        |        |        |        |        |        | 1.02  |
| Hispanic X Physical ability X Physical ability     |        |        |        |        |        |        |        |        |        |        |        | 0.92  |
| Asian X Grit                                       |        |        |        |        |        |        |        |        |        | 0.93   |        |       |
| Asian X Grit X Grit                                |        |        |        |        |        |        |        |        |        | 1.09   |        |       |
| Asian X Cognitive ability                          |        |        |        |        |        |        |        |        |        |        | 0.86   |       |
| Asian X Cognitive ability X Cognitive ability      |        |        |        |        |        |        |        |        |        |        | 0.99   |       |
| Asian X Physical ability                           |        |        |        |        |        |        |        |        |        |        |        | 0.89  |
| Asian X Physical ability X Physical ability        |        |        |        |        |        |        |        |        |        |        |        | 1.07  |
| Other race X Grit                                  |        |        |        |        |        |        |        |        |        | 1.15   |        |       |
| Other race X Grit X Grit                           |        |        |        |        |        |        |        |        |        | 1.11   |        |       |
| Other race X Cognitive ability                     |        |        |        |        |        |        |        |        |        |        | 1.09   |       |
| Other race X Cognitive ability X Cognitive ability |        |        |        |        |        |        |        |        |        |        | 0.97   |       |
| Other race X Physical ability                      |        |        |        |        |        |        |        |        |        |        |        | 0.88  |
| Other race X Physical ability X Physical ability   |        |        |        |        |        |        |        |        |        |        |        | 0.93  |
| Age X Grit                                         |        |        |        |        |        |        |        |        |        | 1.00   |        |       |
| Age X Grit X Grit                                  |        |        |        |        |        |        |        |        |        | 1.03   |        |       |
| Age X Cognitive ability                            |        |        |        |        |        |        |        |        |        |        | 0.94*  |       |
| Age X Cognitive ability X Cognitive ability        |        |        |        |        |        |        |        |        |        |        | 0.98   |       |
| Age X Physical ability                             |        |        |        |        |        |        |        |        |        |        |        | 1.00  |
| Age X Physical ability X Physical ability          |        |        |        |        |        |        |        |        |        |        |        | 1.00  |
| Cohort X Grit                                      |        |        |        |        |        |        |        |        |        | 0.99   |        |       |
| Cohort X Grit X Grit                               |        |        |        |        |        |        |        |        |        | 1.00   |        |       |
| Cohort X Cognitive ability                         |        |        |        |        |        |        |        |        |        |        | 1.01   |       |
| Cohort X Cognitive ability X Cognitive ability     |        |        |        |        |        |        |        |        |        |        | 0.99   |       |
| Cohort X Physical ability                          |        |        |        |        |        |        |        |        |        |        |        | 1.02* |
| Cohort X Physical ability X Physical ability       |        |        |        |        |        |        |        |        |        |        |        | 1.00  |
| <b>R<sup>2</sup></b>                               | 3.64%  | 3.66%  | 3.72%  | 3.77%  | 3.67%  | 2.26%  | 1.40%  | 2.34%  | 2.46%  | 1.89%  | 2.54%  |       |
| <b>n</b>                                           | 10,530 | 10,530 | 10,522 | 10,876 | 10,530 | 11,196 | 10,851 | 10,962 | 11,196 | 10,851 | 10,962 |       |

Note. \*  $p < .05$ , \*\*  $p < .01$ , \*\*\*  $p < .001$

Table S12. Grit Scale

| Item                                                                                              | Subscale     | Included in Grit-S |
|---------------------------------------------------------------------------------------------------|--------------|--------------------|
| I finish whatever I begin.                                                                        | Perseverance | Yes                |
| Setbacks don't discourage me.                                                                     | Perseverance | Yes                |
| I am diligent.                                                                                    | Perseverance | Yes                |
| I am a hard worker.                                                                               | Perseverance | Yes                |
| I have achieved a goal that took years of work.                                                   | Perseverance | No                 |
| I have overcome setbacks to conquer an important challenge.                                       | Perseverance | No                 |
| I often set a goal but later choose to pursue a different one.                                    | Passion      | Yes                |
| My interests change from year to year.*                                                           | Passion      | No                 |
| I have been obsessed with a certain project for a short time but later lost interest.*            | Passion      | Yes                |
| I have difficulty maintaining my focus on projects that take more than a few months to complete.* | Passion      | Yes                |
| I become interested in new pursuits every few months.*                                            | Passion      | No                 |
| New ideas and new projects sometimes distract me from old ones.*                                  | Passion      | Yes                |

Note. \*Reverse-scored item

## References

1. A. L. Duckworth , C. Peterson, M. D. Matthews, D. R. Kelly, Grit: Perseverance and passion for long-term goals. *J. Pers. Soc. Psychol.* **92**(6), 1087-1101 (2007).
2. A. Wrzesniewski *et al.*, Multiple types of motives don't multiply the motivation of West Point cadets. *Proc. Natl. Acad. Sci. U.S.A.* **111**(30), 10990-10995 (2014).
3. A. L. Duckworth, P. D. Quinn, Development and validation of the short grit scale (Grit-S). *J. Pers. Assess.* **91**(2), 166-174 (2009).
4. R. L. Caslen, Commitment to character and excellence, USMA strategic plan 2017-2022 (2016).
